# Supplementary material
Source: Springer Nature journal article supplement (https://www.springermedizin.de/resource/supplementary/12899_2012_200_MOESM8_ESM.pdf/9514664)

**A****UROTHELIUM**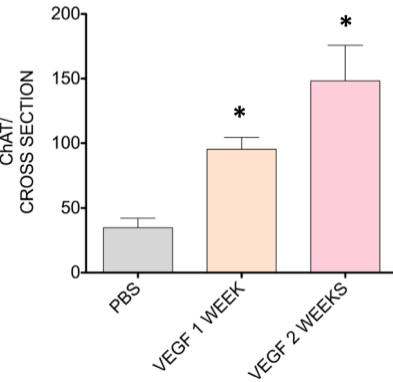**B****LAMINA PROPRIA**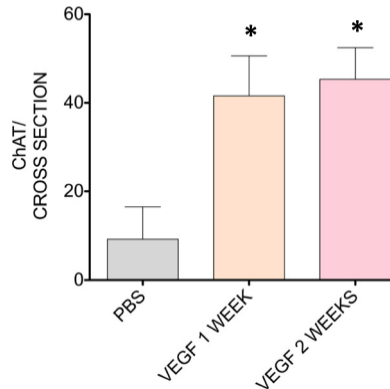**C****DETRUSOR**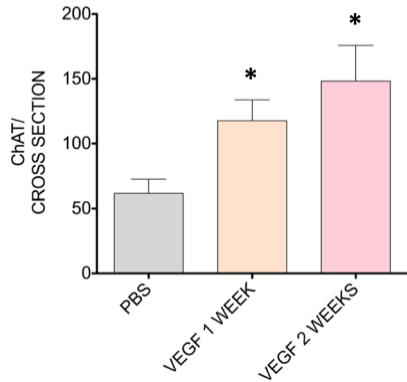

Supplement: MOESM8 [file 9514664]
